# Supplementary material for: Contact metamorphic reactions and fluid–rock interactions related to magmatic sill intrusion in the Guaymas Basin
Source: Copernicus journal article supplement (doi:10.5194/ejm-35-987-2023), 2023-11-16
Supplement: Supplementary file 1 [file ejm-35-987-2023-supplement.zip]

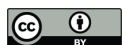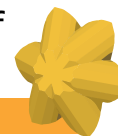

*Supplement of*

**Contact metamorphic reactions and fluid–rock interactions related to magmatic sill intrusion in the Guaymas Basin**

**Alban Cheviet et al.**

*Correspondence to:* Alban Cheviet ([alban.cheviet@univ-fcomte.fr](mailto:alban.cheviet@univ-fcomte.fr))

- [ejm-35-987-2023-supplement-title-page.pdf](#)
- [Table S1.jpg](#)
- [Table S2.jpg](#)
- [Table S3.jpg](#)
- [Table S4.jpg](#)
- [fig\\_S1.jpg](#)

The copyright of individual parts of the supplement might differ from the article licence.
